# Supplementary material for: Dual catalytic activity of hexagonal Mg–Sr codoped ZnO nanocrystals for the degradation of an industrial levafix olive reactive dye under sunlight and biosensing applications
Source: Royal Society of Chemistry journal article supplement (doi:10.1039/d3re00219e), 2023-01-01
Supplement: d3re00219e1.pdf [file d3re00219e1.pdf]

**Dual catalytic activity of hexagonal Mg-Sr co-doped ZnO nanocrystals for degradation  
of industrial levafix olive reactive dye under sunlight and sensor applications**

Sanakousar. F. M<sup>1</sup>, Vidyasagar. C. C<sup>1\*</sup>, Shikandar. D. B<sup>2\*</sup>, Mounesh<sup>3</sup>, Viswanatha. C. C<sup>4</sup>,

Gururaj Hosamani<sup>5</sup>, Prakash. K<sup>6</sup>, Manjunath. N. K<sup>7</sup>

<sup>1</sup>Department of PG Studies and Research in Chemistry, Rani Channamma University,  
Belagavi-591156 Karnataka, India.

<sup>2</sup>Department of Chemistry, K.L.E. Institute of Technology, Hubli-580030, Karnataka, India.

<sup>3</sup>Centre for Nano and Materials Science, Jain Global Campus, Bangalore-562112, Karnataka,  
India.

<sup>4</sup>Department of Chemistry, J.S.S Arts, Science & Commerce College, Gokak-591307, India

<sup>5</sup>Department of Electronics, Government First Grade College, Channarayapatna, Hassan,  
India

<sup>6</sup>Department of Environmental Science, Gulbarga University, Kalaburgi-585106, Karnataka,  
India.

<sup>7</sup>Department of PG Studies and Research in Geography, Rani Channamma University,  
Belagavi-591156 Karnataka, India.

**(Email: [vidya.891@gmail.com](mailto:vidya.891@gmail.com) Cell No.: +91-9742885912)**

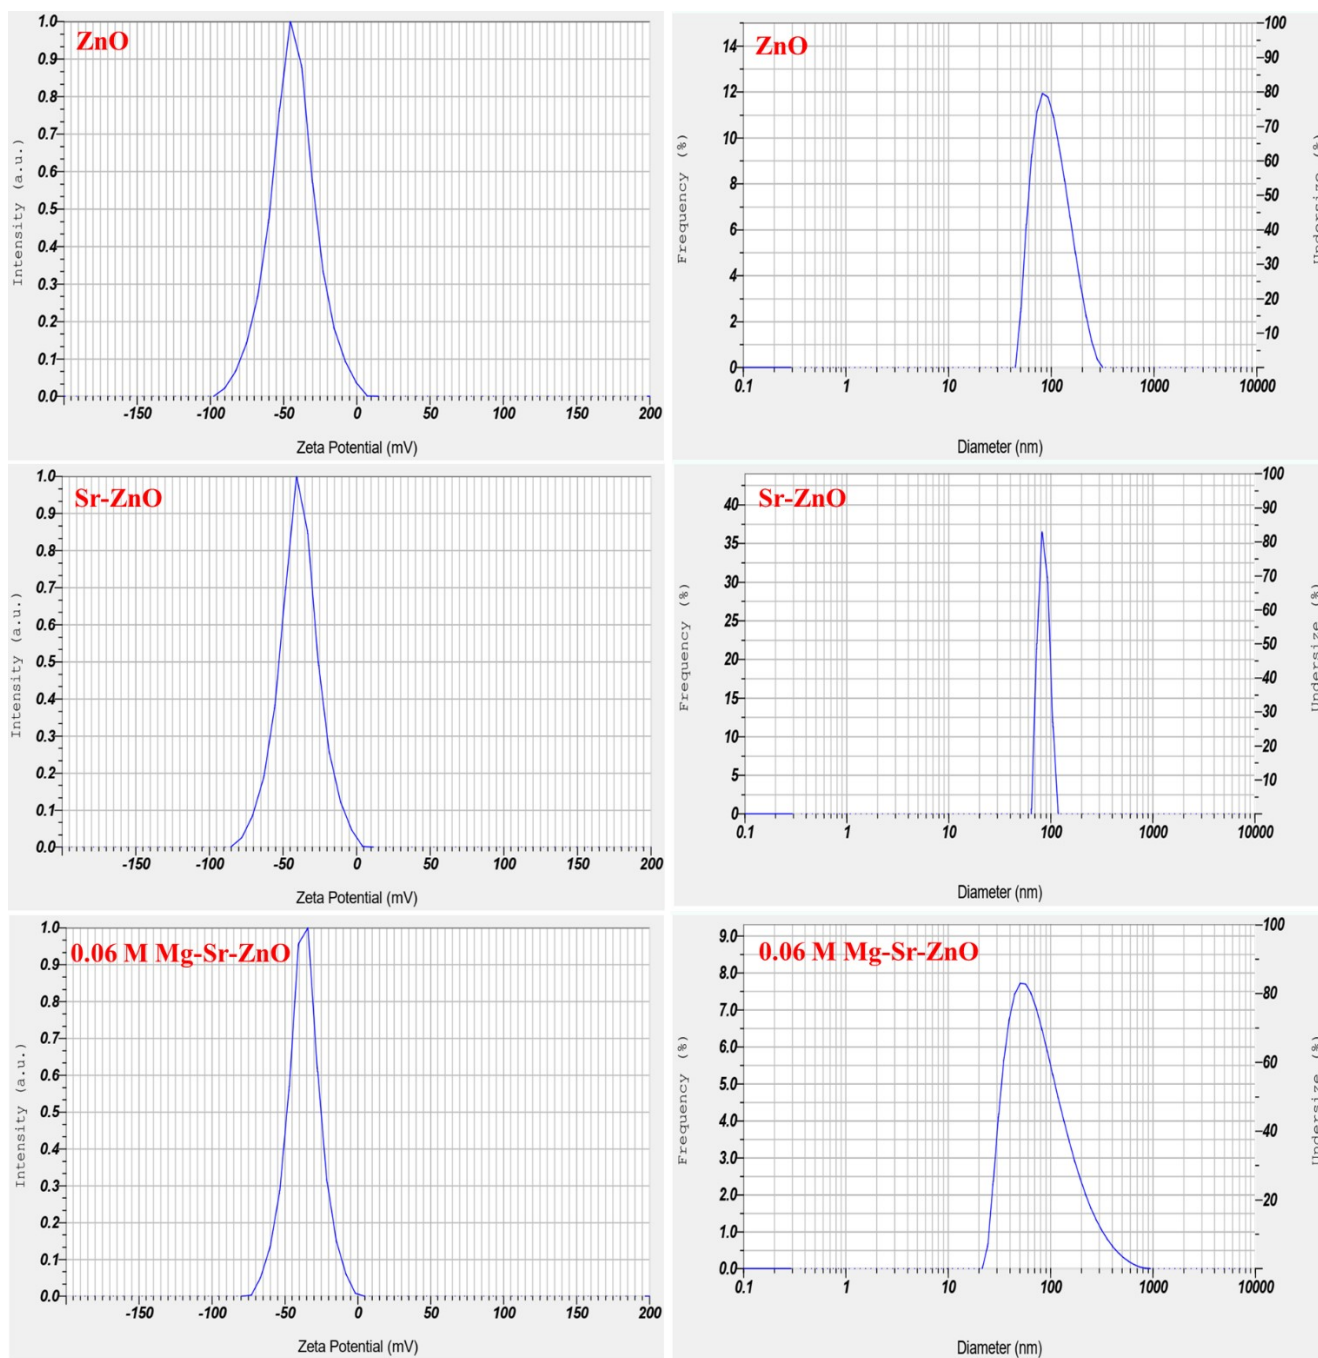

**Figure S1.** Zeta potential and DLS measurements of the nanocrystals.

**Table S1.** Zeta potential and mean particle size of prepared nanocrystals.

| <b>Sample</b>    | <b>Zeta potential<br/>(mV)</b> | <b>Mean particle size<br/>(nm)</b> |
|------------------|--------------------------------|------------------------------------|
| ZnO              | -43.8                          | 100.8                              |
| Sr-ZnO           | -39.2                          | 81.1                               |
| 0.06 M Mg-Sr-ZnO | -36.9                          | 90.4                               |
